1 **TITLE:**

2 **Chloroplast genome assemblies and comparative analyses of major *Vaccinium* berry crops**

3

4

5 **Authors:** Annette M. Fahrenkrog<sup>1</sup>, Gabriel Matsumoto<sup>1</sup>, Katalin Toth<sup>2,3</sup>, Soile Jokipii-Lukkari<sup>2</sup>,

6 Heikki M. Salo<sup>2</sup>, Hely Häggman<sup>2</sup>, Juliana Benevenuto<sup>1\*</sup>, Patricio Munoz<sup>1\*</sup>

7

8 **Affiliations:**

9 1. Horticultural Sciences Department, University of Florida, Gainesville, FL 32611, USA

10 2. Ecology and Genetics Research Unit, University of Oulu, FI-90014, Oulu, Finland

11 3. Inari Agriculture Nv, Industriepark Zwijnaarde 7a, 9052 Gent, Belgium

12

13 **\*Corresponding authors:**

14 Juliana Benevenuto. Email: [jbenevenuto@ufl.edu](mailto:jbenevenuto@ufl.edu)

15 Patricio Munoz. Email: [p.munoz@ufl.edu](mailto:p.munoz@ufl.edu)

16

17

18

19

20

21 **ABSTRACT**

22 **Background:** *Vaccinium* is an economically important genus of berry crops in the family  
23 Ericaceae. Given the numerous hybridizations and polyploidization events among *Vaccinium*  
24 species, the taxonomy of this genus has remained uncertain and the subject of long debate.  
25 Therefore, the availability of more genomic resources for *Vaccinium* can provide useful tools for  
26 phylogenetic resolution, species identification, authentication of berry food products, and a  
27 framework for genetic engineering.

28 **Results:** In this study, we assembled five *Vaccinium* chloroplast sequences representing the  
29 following berry types: northern highbush blueberry (*V. corymbosum*), southern highbush  
30 blueberry (*V. corymbosum* hybrids), rabbiteye blueberry (*V. virgatum*), lowbush blueberry (*V.*  
31 *angustifolium*), and bilberry (*V. myrtillus*). Two complete plastid genomes were achieved using  
32 long-read PacBio sequencing, while three draft sequences were obtained using short-read  
33 Illumina sequencing. Comparative analyses also included other previously available *Vaccinium*  
34 chloroplast sequences, especially the commercially important species *V. macrocarpon*  
35 (cranberry). The *Vaccinium* chloroplast genomes exhibited a circular quadripartite structure,  
36 with an overall highly conserved synteny and sequence identity among them. Despite their high  
37 similarity, we identified some polymorphic regions in terms of expansion/contraction of  
38 inverted repeats, gene copy number variation, simple sequence repeats, and single nucleotide  
39 polymorphisms. Phylogenetic analysis revealed multiple origins of highbush blueberry  
40 plastomes, likely due to the hybridization events during northern and southern highbush  
41 blueberry domestication.

42 **Conclusions:** Our results enrich the genomic data availability for new *Vaccinium* species by  
43 sequencing and assembling the chloroplast DNA of major economically important berry types.  
44 Additional whole plastome analyses including more samples and wild species will be useful to  
45 obtain a refined knowledge of the maternal breeding history of blueberries and increase  
46 phylogenetic resolution at low taxonomic levels.

47

48 **keywords:** plastome, blueberry, cranberry, bilberry, breeding, hybridization

49

## 50 **Background**

51           The genus *Vaccinium* L. (family Ericaceae) comprises more than 450 species of wide  
52 geographic distribution, occurring mostly in the Northern Hemisphere and in mountainous  
53 regions of tropical Asia, Central and South America. With a few exceptions, most of the berry  
54 fruits produced by the genus are edible by both birds and mammals [1]. Some species have  
55 become economically important crops over the past century, being either bred and cultivated  
56 in commercial fields, or harvested from managed wild stands [2]. The major commercial crops  
57 are northern highbush blueberries (*V. corymbosum* L.), southern highbush blueberries (*V.*  
58 *corymbosum* L. hybrids), lowbush blueberries (*V. angustifolium* Aiton), rabbiteye blueberries (*V.*  
59 *virgatum* Aiton), bilberries (*V. myrtillus* L.), cranberries (*V. macrocarpon* Aiton), and  
60 lingonberries (*V. vitis-idaea* L.). In addition to their pleasant flavors, the nutritional value of  
61 these berries has led to a significant increase in consumption and production worldwide. In the  
62 United States alone, the wholesale value of the *Vaccinium* berry industry exceeds US\$1 billion  
63 per year [3].

64           Given the diversity and complexity of the genus *Vaccinium*, it has been further divided  
65 into more than 33 sections or subgenera [4]. The most important *Vaccinium* crop species are  
66 found in the sections *Cyanococcus* (blueberries), *Oxycoccus* (cranberry), *Vitis-Idaea*  
67 (lingonberry), and *Myrtillus* (bilberry) [5]. However, species and section delimitations have been  
68 extensively discussed in the literature, as they do not form monophyletic groups [6, 7]. The  
69 taxonomic classification has been difficult to resolve because of considerable phenotypic  
70 variability with overlapping morphologies, complex ploidy series (ranging from diploids to  
71 hexaploids), and general lack of crossing barriers leading to numerous hybridization events [5].

72 As a result, some species are burdened with an extensive synonymy according to different  
73 authors [1, 8, 9]. Nevertheless, this great diversity and intra-/inter-sectional cross-compatibility  
74 have been exploited by breeding programs, allowing for the introduction of useful traits from  
75 many species [10–14]. Interspecific hybridizations within the *Vaccinium* section *Cyanococcus*,  
76 for example, have played a critical role in the development of low chill southern highbush  
77 blueberries through numerous crosses of northern highbush blueberry with warm-adapted  
78 Florida native species [10, 15].

79 A few studies have used molecular data to perform phylogenetic analyses of the genus  
80 and relevant sections, including the use of simple sequence repeats [16], chloroplast *matK* and  
81 *ndhF* genes and the nuclear ribosomal ITS region [6, 17]. These studies have supported the  
82 polyphyletic status of current taxonomic groups and were not able to resolve close  
83 relationships. With the decreasing costs of next-generation sequencing, using the whole  
84 plastome as a “super-barcode” is becoming a popular strategy for increased resolution at lower  
85 plant taxonomic levels [18–20]. Whole chloroplasts can provide more sequence-based  
86 polymorphisms, and its genetic properties (i.e., uniparental inheritance, haploid, and non-  
87 recombinant nature) can simplify phylogenetic reconstructions when dealing with mixed-ploidy  
88 species. However, only a few *Vaccinium* chloroplast genomes have been published so far, with  
89 most of these studies reporting only the plastome assembly, without performing comparative  
90 analyses [21–27]. Moreover, organellar genomes of horticultural plants are overall  
91 underrepresented in databases [28].

92 By generating additional chloroplast genome sequences for *Vaccinium* species, we aim  
93 to provide valuable resources to assist future taxonomic and domestication studies, the

94 development of simple molecular markers for the authentication of berry-based products [29],  
95 and a framework for chloroplast biotechnology [30, 31]. Therefore, in this study, we report the  
96 assembly of five *Vaccinium* chloroplast sequences representing the following berry types:  
97 northern highbush blueberry – NHB (*V. corymbosum*), southern highbush blueberry – SHB (*V.*  
98 *corymbosum* hybrids), rabbiteye blueberry (*V. virgatum*), lowbush blueberry (*V. angustifolium*),  
99 and bilberry (*V. myrtillus*). We compared the assemblies in terms of synteny and gene content.  
100 We also performed whole plastome phylogenetic analyses including other available *Vaccinium*  
101 sequences.

102

## 103 **Results**

### 104 ***Chloroplast genome assembly***

105 The whole genome sequence reads used to assemble the chloroplast DNA (cpDNA) of  
106 the five *Vaccinium* species were obtained using two different sequencing platforms: (i) a PacBio  
107 long reads approach was used to sequence SHB and rabbiteye, and (ii) an Illumina short reads  
108 approach was used for NHB, lowbush, and bilberry.

109 Complete cpDNA assemblies (sequences without any gaps) were obtained for SHB and  
110 rabbiteye using PacBio long reads. A total of 20 contigs (longest contig: 277,507 bp) were  
111 assembled for SHB, while the rabbiteye assembly generated two contigs (longest contig:  
112 233,010 bp). Given the length of the complete cpDNA from a related species (cranberry)  
113 downloaded from GenBank (~176 kb) [22], the longest contigs of SHB and rabbiteye were likely  
114 to contain the complete cpDNA sequence. When the longest contigs were circularized,  
115 redundant sequences from their termini were trimmed. The assemblies were further polished,

116 introducing minor modifications. The final SHB and rabbiteye assemblies were 191,378 and  
117 195,878 bp long, respectively (Table 1).

118 The NHB, lowbush and bilberry cpDNAs were obtained from short reads only, resulting  
119 in lower quality assemblies compared to the SHB and rabbiteye cpDNA sequences. The short-  
120 read assemblies yielded several contigs and a reference-guided scaffolding was performed to  
121 obtain a single pseudomolecule. The polishing procedure and the placement of a consensus  
122 inverted repeat into the sequences were collectively able to close some gaps, although a few  
123 remained. The final draft cpDNA assemblies had 186,057, 182,334, and 191,744 bp for NHB,  
124 lowbush and bilberry, respectively (Table 1).

125 The final cpDNA sequences obtained showed a quadripartite structure, with a large  
126 single copy (LSC) region ranging between 105,715 and 107,608 bp, a pair of inverted repeats  
127 (IRA and IRB) ranging from 35,864 to 43,207 bp, and a small single copy (SSC) region ranging  
128 from 2,998 to 3,038 bp (Figure 1, Table 1, Figure S1). The SSC region was inverted in the  
129 cranberry cpDNA compared to the other assemblies (Figure 1, Figure 2).

130  
131  
132  
133  
134  
135  
136  
137  
138  
139  
140

141 **Table 1.** Assembly and annotation statistics of the chloroplast genomes from six *Vaccinium* species.

| <i>cpDNA</i>                              | SHB                             | Rabbiteye            | NHB                            | Lowbush                           | Bilberry            | Cranberry                  |
|-------------------------------------------|---------------------------------|----------------------|--------------------------------|-----------------------------------|---------------------|----------------------------|
| <b>Species</b>                            | <i>V. corymbosum</i><br>hybrids | <i>V. virgatum</i>   | <i>V.</i><br><i>corymbosum</i> | <i>V.</i><br><i>angustifolium</i> | <i>V. myrtillus</i> | <i>V. macrocarpon</i>      |
| <b>Genotype</b>                           | Arcadia                         | Ochlockonee          | Draper                         | Brunswick                         | OU-L2               | Stevens                    |
| <b>Sequencing</b>                         | PacBio/Illumina                 | PacBio/Illumina<br>a | Illumina                       | Illumina                          | Illumina            | PacBio                     |
| <b>Assembler</b>                          | Canu                            | Canu                 | Novoplasty                     | Novoplasty                        | Spades/CAP3         | Canu                       |
| <b>Genome size (bp)</b>                   | 191,378                         | 195,878              | 186,057                        | 182,334                           | 191,744             | 176,095                    |
| <b>Number of gaps<br/>(stretch of Ns)</b> | 0                               | 0                    | 2                              | 5                                 | 16                  | 0                          |
| <b>LSC size (bp)</b>                      | 106,385                         | 106,427              | 105,714                        | 107,607                           | 107,134             | 104,591                    |
| <b>SSC size (bp)</b>                      | 3,037                           | 3,035                | 3,027                          | 2,997                             | 3,008               | 3,028                      |
| <b>IR size (bp)</b>                       | 40,978                          | 43,208               | 38,658                         | 35,865                            | 40,801              | 34,238                     |
| <b>Total number of<br/>genes*</b>         | 112 (136)                       | 112 (136)            | 112 (136)                      | 112 (139)                         | 112 (145)           | 112 (134)                  |
| <b>Protein-coding<br/>genes*</b>          | 74 (85)                         | 74 (85)              | 74 (85)                        | 74 (85)                           | 74 (89)             | 74 (85)                    |
| <b>tRNA genes*</b>                        | 34 (43)                         | 34 (43)              | 34 (43)                        | 34 (46)                           | 34 (48)             | 34 (41)                    |
| <b>rRNA genes*</b>                        | 4 (8)                           | 4 (8)                | 4 (8)                          | 4 (8)                             | 4 (8)               | 4 (8)                      |
| <b>GC%</b>                                | 36.8                            | 36.8                 | 36.8                           | 36.8                              | 36.6                | 36.8                       |
| <b>Accession Number</b>                   | XXXX                            | XXXX                 | XXXX                           | XXXX                              | XXXX                | MK715447.1                 |
| <b>Reference</b>                          | This work                       | This work            | This work                      | This work                         | This work           | Diaz-Garcia et al.<br>2019 |

142 \*Number of unique functional genes. In parentheses: Number of genes including duplicates.

143

144

145

146 **Gene annotation**

147           The five cpDNA sequences assembled here (SHB, NHB, rabbiteye, lowbush, and bilberry)  
148 and the cranberry cpDNA assembly downloaded from GenBank (with minor modifications, see  
149 Methods) were annotated for genic features, including ribosomal RNAs (rRNAs), transfer RNAs  
150 (tRNAs), and protein-coding genes. For all samples, around 40% of the annotated features had  
151 to be manually curated by comparison with annotations available for other plant species (Table  
152 S2).

153           All chloroplast genomes contained the same number of unique putatively functional  
154 genes (112), including 74 protein-coding genes, 34 tRNAs, and 4 rRNAs (Table 1 and Table S2).  
155 However, the genomes differed in the number of copies present for the genes *rpl32*, *rps16*,  
156 *trnfM-CAU*, *trnG-GCC*, and *trnL-UAG* (Figure 1, Table S2). Most of the copy number variation of  
157 genes occurred in the draft sequences of lowbush and bilberry. The LSC contains most of the  
158 tRNAs (28) and protein-coding genes (63). The IRs contain all four rRNA genes, 11 protein-  
159 coding genes and six tRNA genes, which are therefore duplicated in the chloroplast genomes.  
160 The SSC contains only one protein-coding gene (*ndhF*), transcribed in the opposite orientation  
161 in cranberry when compared to the other genomes (Figure 1).

162           Nineteen genes contain introns: ten protein-coding genes, and nine tRNA genes. Among  
163 those genes, the *rps12* and *psbA* genes had interesting patterns. For the *rps12* gene, the first  
164 exon was predicted to be transcribed in the forward direction, while exons 2 and 3 were  
165 encoded in the reverse orientation. The *rps12* gene segment containing exon 1 was separated  
166 by around 73 kb from the segment containing exons 2 and 3. The *psbA* gene was the only gene  
167 spanning the LSC/IR junction, with the starting portion (236 bp) located in the LSC region and



168 the remaining portion (826 bp) located at the end of the IRA. A fragment of the gene is also  
169 present in the IRB region, but this partial copy of *psbA* lacks the gene start. The *psbA* gene  
170 segments show the same length in all assemblies except in lowbush, where the gene start  
171 located in the LSC is 386 bp long due to an insertion.

172 In addition to putative functional genes, eight gene fragments or pseudogenes were  
173 reported by the annotation programs in the six *Vaccinium* assemblies: *accD*, *clpP*, *infA*, *psbG*,  
174 *ycf1*, *ycf2*, *ycf15*, *ycf68* (Table S3). These gene fragments/pseudogenes were removed from the  
175 final annotation files and analyses.

176

177

178

179

180

181

182

183

184

185

186

187

188

189

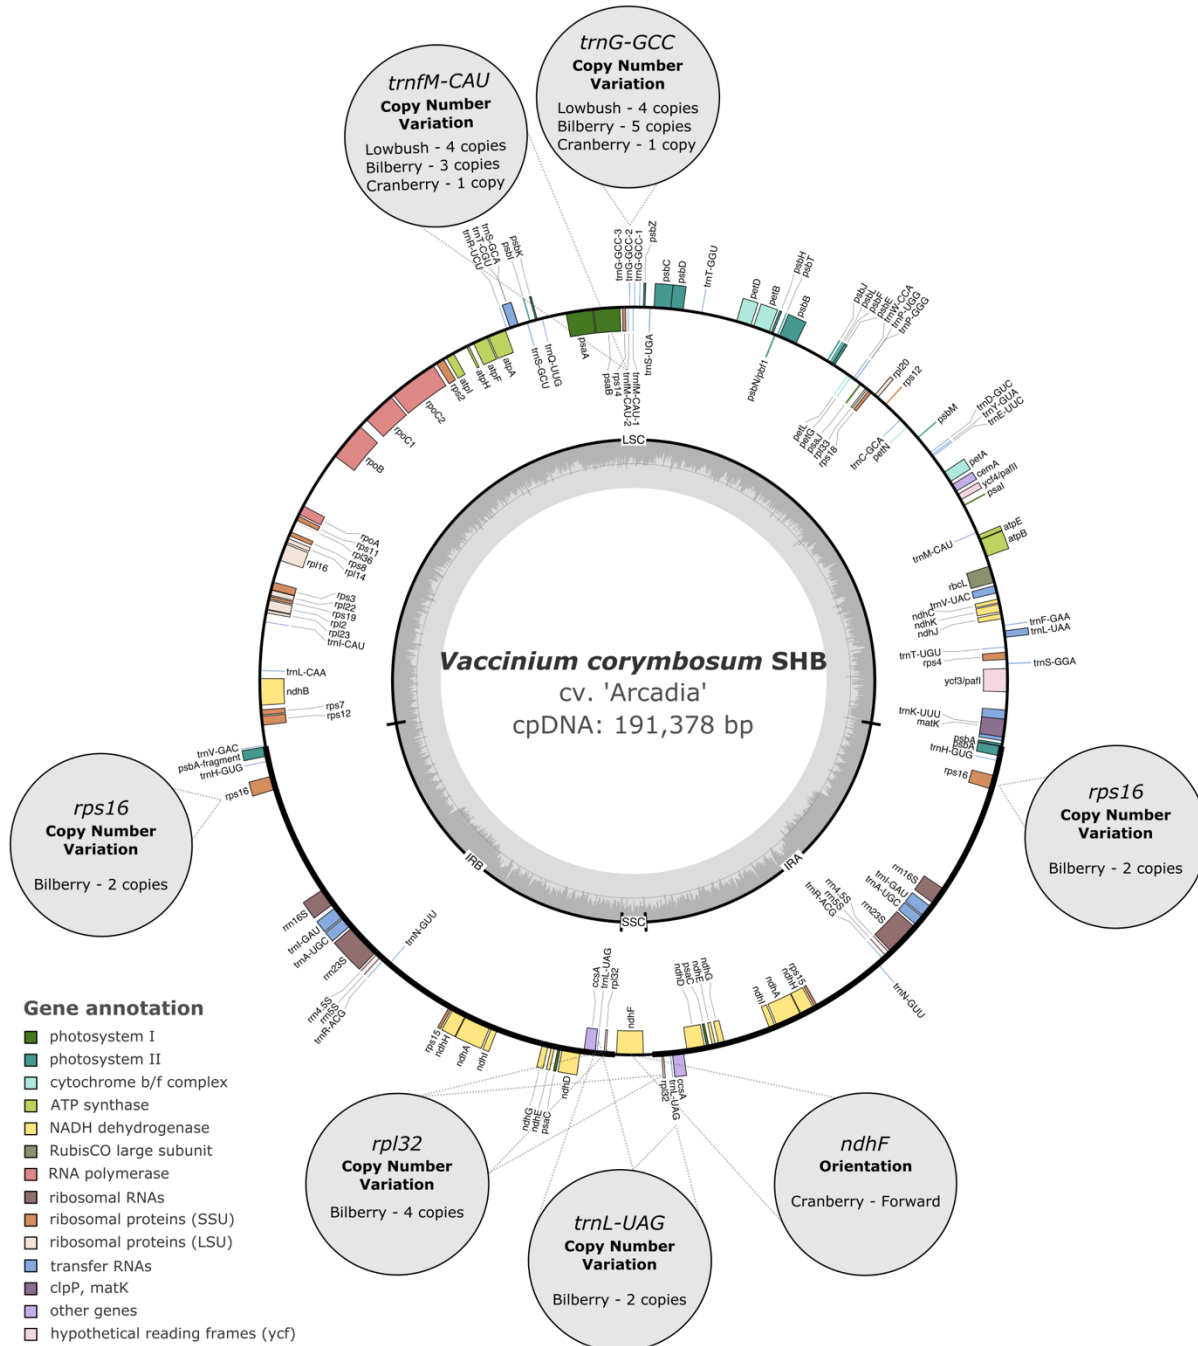

190 **Figure 1.** Circular chloroplast genome map of southern highbush blueberry cv. 'Arcadia' (*V. corymbosum* hybrids).  
 191 Outer gray bubbles indicate the variable annotation features among the six *Vaccinium* assemblies. Genes drawn  
 192 outside and inside the map represent genes transcribed counterclockwise and clockwise, respectively, and the  
 193 different colors represent their putative functional annotation. The large single copy (LSC), inverted repeats (IRA  
 194 and IRB), and small single copy (SSC) regions are shown in the black inner circle. The gray inner circle shows GC  
 195 content.  
 196

197 ***Comparative genomic analysis***

198           The sequence similarity between the six cpDNAs was assessed through multiple  
199 sequence alignments, which showed that the *Vaccinium* cpDNAs are highly conserved and  
200 syntenic, with most of the variation present in non-coding regions (Figure 2, Figure S2). The  
201 main structural differences found were insertions/deletions around the IR borders and the  
202 opposite orientation of the SSC in the cranberry cpDNA when compared to the other  
203 assemblies. Overall, the cpDNAs showed a sequence identity to the consensus ranging between  
204 82.98% (cranberry) and 91.50% (rabbiteye). The most conserved regions were the LSC (94.16 –  
205 97.23% of identity) and the SSC (91.53 – 98.51% of identity), while the IR was the most  
206 divergent region (69.82 – 87.64% of identity) (Table S4).

207

208

209

210

211

212

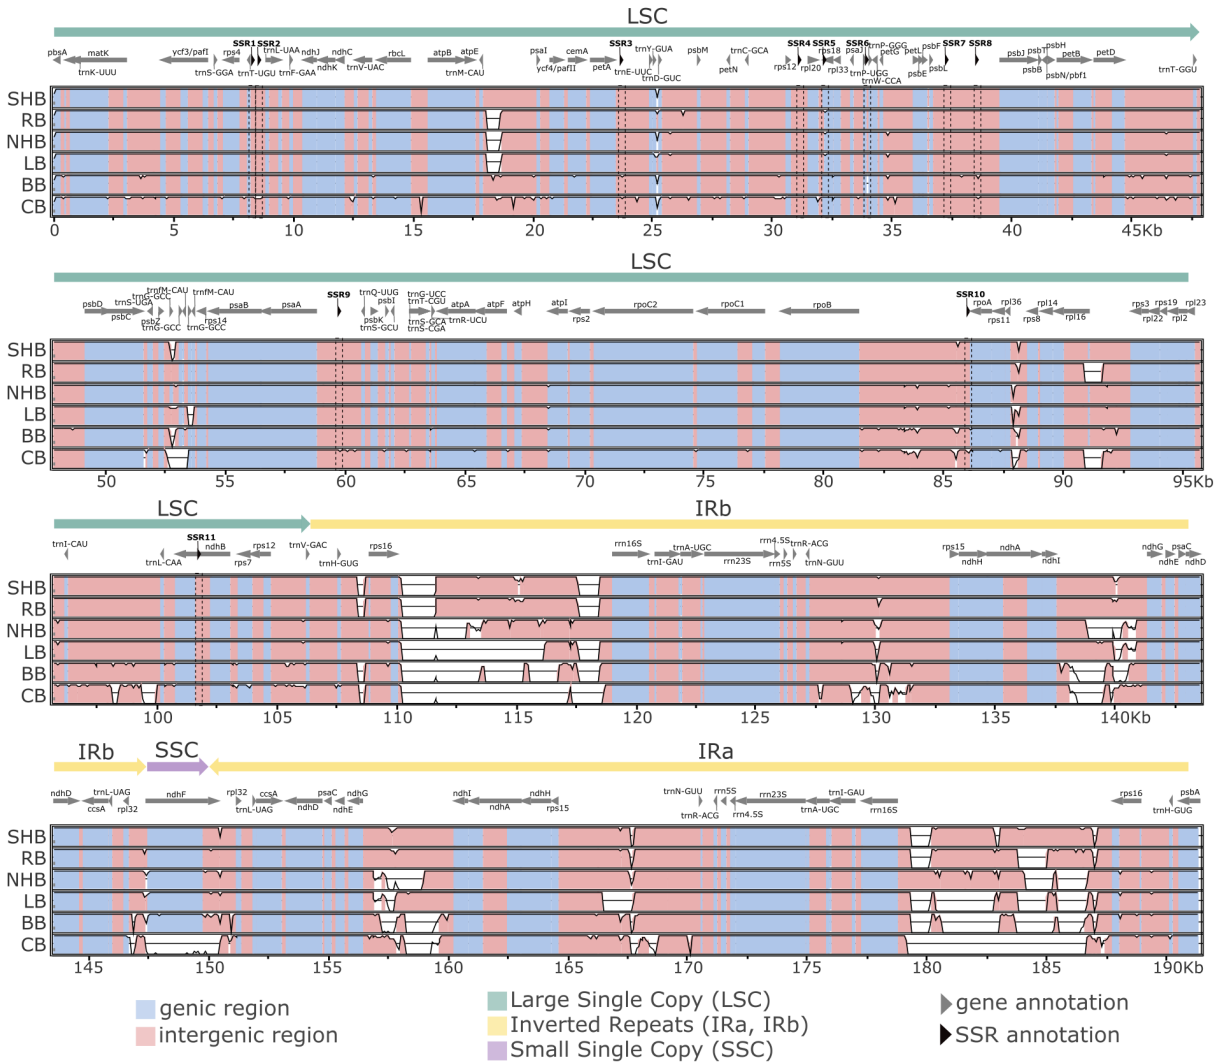

213

214 **Figure 2.** Multiple sequence alignment of *Vaccinium* chloroplast genomes performed with mVISTA. The x-axis  
 215 represents the coordinates of the southern highbush blueberry chloroplast genome sequence used as reference.  
 216 The y-axis represents the percentage identity ranging from 50 to 100% for each *Vaccinium* species. Divergent  
 217 regions due to low sequence similarity or presence of insertions/deletions are shown in white. Polymorphic simple  
 218 sequence repeat (SSR) regions are highlighted with dashed lines. Abbreviations correspond to the species common  
 219 names as following: SHB (Southern Highbush Blueberry), RB (Rabbiteye Blueberry), NHB (Northern Highbush  
 220 Blueberry), LB (Lowbush Blueberry), BB (Bilberry), and CB (Cranberry).

221

222

223

224

## 225 ***Simple sequence repeat analysis***

226           The six *Vaccinium* cpDNA assemblies were screened for the presence of simple  
227 sequence repeats (SSRs), identifying between 77 (lowbush) and 109 (rabbiteye) SSRs (Table S5,  
228 Table S6). Mononucleotide repeats were most frequent repeat type found (27-41), followed by  
229 tetra- (18-28) and dinucleotide repeats (9-31). Trinucleotide repeats were found in lesser  
230 numbers (6-8) and pentanucleotide repeats were identified only in bilberry (4) and cranberry  
231 (6). Hexanucleotide repeats were more frequent in SHB (13) and rabbiteye (15) than in the  
232 other species (3-9), while compound repeats (two repeats separated by a non-repeat sequence)  
233 were more frequent in NHB (14) and lowbush (12) than in the remaining species (2-6). Most  
234 compound repeats were composed of mononucleotide repeats. In terms of SSR density, the  
235 inverted repeats contained ~0.75 SSRs/kb, twice as many as the single copy regions (~0.34  
236 SSRs/kb).

237           Given that they are easier to genotype and thus are potentially useful as molecular  
238 markers, we looked for polymorphisms among the six *Vaccinium* plastomes considering SSRs  
239 with di-, tri-, tetra-, penta-, and hexanucleotide repeats, excluding mononucleotide and  
240 compound repeats. A total of 54 SSR loci were evaluated either because they were detected in  
241 all species, or because they were detected in a subset of species but not in others, indicating  
242 that they were missed for not meeting the repeat number detection threshold and thus were  
243 likely polymorphic. The ClustalW multiple sequence alignment revealed that most SSRs at the  
244 IRs were in regions with gaps for some species and were present multiple times in the  
245 *Vaccinium* genomes, making them poor candidates for marker development. In contrast, most  
246 SSRs located in the LSC mapped to only one region, yielding a list of 11 polymorphic SSRs

247 (Figure 2). Bilberry and cranberry showed greater variation at these loci, while SHB, rabbiteye,  
248 NHB and lowbush generally shared the same alleles (Table S7, Figure S3). Therefore, even the  
249 combination of these 11 SSRs was not enough to discriminate among closely related species.

250

### 251 ***Phylogenetic tree***

252 The whole plastome alignment of 15 species yielded homologous sequence blocks  
253 comprising a total of 86,628 bp in length. Most of the sites were conserved across the species,  
254 and 8,205 single nucleotide polymorphisms (SNPs) were detected. Out of those, 1,461 were  
255 parsimony-informative and 6,744 were singletons (i.e., mutations appearing only once among  
256 the sequences).

257 A maximum likelihood tree was reconstructed to show the phylogenetic relationships  
258 among the species (Figure 3A). *Vaccinium* species belonging to different sections were  
259 supported in the phylogenetic tree, except for the *Cyanococcus* section which was not  
260 monophyletic. The species *V. uliginosum* is classified as in the section *Vaccinium*, however it  
261 was placed among the species in section *Cyanococcus*. Within the *Cyanococcus* section, it is also  
262 noteworthy that the SHB cpDNA was more closely related to *V. virgatum* (rabbiteye) than to *V.*  
263 *corymbosum* (NHB), while NHB showed a closer relationship to *V. angustifolium* (lowbush  
264 blueberry).

265 Despite considering a large chloroplast genomic region, only few mutational steps  
266 separated haplotypes of closely related species. For example, 27 polymorphisms differentiated  
267 SHB from rabbiteye, 12 between NHB and lowbush, and two between cranberry and its wild

268 relative *V. microcarpum* (Figure 3B). Some allelic variants at the tips of the network were  
 269 species-specific and could serve as potential molecular markers.  
 270

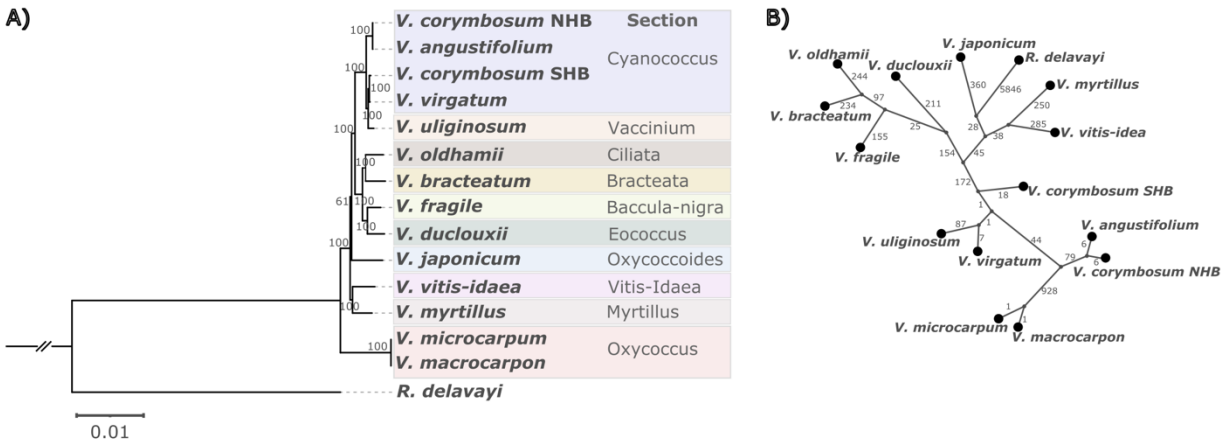

271  
 272 **Figure 3.** Phylogenetic and haplotype network analyses of whole chloroplast genomes of *Vaccinium* species. **A)**  
 273 Maximum likelihood phylogenetic tree. Different shades of colors represent different *Vaccinium* sections. Branch  
 274 labels indicate the bootstrap support values. The scale bar represents nucleotide substitutions per site and double  
 275 slash-marks indicate out-of-scale. The sequence of *Rhododendron delavayi* was used as an outgroup to root the tree.  
 276 **B)** Haplotype network showing the mutational steps separating the species. Segment length is not proportional to  
 277 number of mutations.

278  
 279  
 280  
 281

## 282 Discussion

283 Since the first *Vaccinium* chloroplast DNA sequence was published in 2013 [21], next-  
 284 generation sequencing technologies have enabled the assembly of plastomes for additional  
 285 species in this genus, making nine *Vaccinium* cpDNAs available to date [21–27]. Here, we  
 286 performed *de novo* assembly of the plastomes of five additional *Vaccinium* species, including  
 287 the four most important cultivated blueberry types and bilberry.

288           The highest quality complete plastome assemblies were obtained for SHB and rabbiteye,  
289           which were sequenced using long reads from the PacBio platform. The availability of long reads  
290           has allowed assembly of the entire cpDNA as a single contig, similar to the assembly done for  
291           cranberry using the same technology [22]. Although the remaining species were sequenced  
292           with Illumina short reads and the assemblies were split into more than one contig, the use of a  
293           reference cpDNA to order the contigs was able to generate draft plastomes for NHB, lowbush  
294           and bilberry containing only a few gaps in their sequences.

295           All six *Vaccinium* cpDNA sequences compared here showed the typical circular  
296           quadripartite structure for angiosperms, including the two copies of inverted repeats  
297           separating the large and the small single copy regions [32]. The length of the *Vaccinium* cpDNA  
298           assemblies was also within the range reported for plant species (107–218 kb) [20]. However, a  
299           drastic reduction in the SSC region was observed among the *Vaccinium* assemblies (~3 kb)  
300           compared to most angiosperms (16–27 kb), which has also been reported for other members of  
301           the *Ericaceae* family [33–35].

302           Most angiosperm chloroplast genomes contain 110–130 distinct genes, approximately  
303           80 genes coding for proteins and other genes coding for 4 rRNAs and 30 tRNAs. For the six  
304           *Vaccinium* species analyzed in this study, a total of 112 distinct genes were annotated (74  
305           protein-coding, 34 tRNA and 4 rRNA genes). A recent study comparing the plastomes of five  
306           other *Vaccinium* species showed differences in gene content among them [36]. This differs  
307           from our findings, where even the most distant taxon in the phylogenetic tree (cranberry)  
308           carries the same genes as the other *Vaccinium* species sequenced herein. This discrepancy  
309           could be due to software mispredictions. In our study, we observed that using more than one



310 gene prediction software and performing manual curation were important steps for the proper  
311 identification of genes in chloroplast genomes. For example, in our work, we identified four  
312 tRNA genes (*trnfM-CAU*, *trnG-GCC*, *trnS-CGA*, *trnS-GCA*) not previously reported in the  
313 cranberry plastome, and five putatively functional genes (*atpF*, *ccsA*, *ndhG*, *ndhK*, *rps16*) that  
314 were previously considered pseudogenes [21, 22]. Instead of a difference in the absolute  
315 number of distinct genes, we found copy number variation for five genes. However, these copy  
316 number variations warrant further validation, since most of them were identified in the lower-  
317 quality assemblies of lowbush and bilberry. Eight gene fragments or putative pseudogenes  
318 were identified here, including the *accD*, *clpP* and *infA* genes, which have been previously  
319 reported as pseudogenes in cranberry but as functional in other members of the *Ericaceae*  
320 family[34].

321         Besides the gene content, comparative genomics analyses among the six *Vaccinium*  
322 species also revealed high similarity in terms of sequence identity and synteny. Overall,  
323 sequence identity was higher in coding than in non-coding regions. One synteny difference  
324 identified was the opposite orientation of the SSC in cranberry when compared to the other  
325 assemblies. However, it has been shown in other plant species that both SSC orientations can  
326 be present simultaneously within the same individual due to chloroplast heteroplasmy [37, 38].  
327 Therefore, at this point, we cannot consider the SSC orientation a consistent rearrangement in  
328 cranberry. Another structural difference was found in a non-coding region close to the IR/LSC  
329 boundaries, where the cranberry cpDNA (shortest plastome) shows a missing fragment of  
330 approximately 8 kb when compared to rabbiteye (longest plastome). This difference between  
331 assemblies is reflected in the lower sequence identity shown within the IRs. Greater sequence

332 divergence within the IRs was also reported in a previous comparison between five other  
333 *Vaccinium* species [39]. Indeed, expansion/contraction of the IRs is one of the major causes for  
334 plastome size differences between plant species [32].

335           Comparison of the abundance of different SSR repeat units showed that  
336 mononucleotide repeats were the most frequent repeat type. Also, most compound repeats  
337 were composed of mononucleotide repeats. Mononucleotide repeats have been shown to be  
338 the most abundant and variable class in other plant species [40, 41]; however, their use as  
339 molecular markers have been limited given their lower reliability and difficulty to genotype  
340 [42]. Therefore, we searched for variability only at orthologous SSRs with longer repeat units  
341 and located at single copy regions, identifying 11 polymorphic SSRs. However, these SSRs were  
342 unable to distinguish close *Vaccinium* species. Their use for intraspecific variability also needs  
343 further investigation. In contrast, some species-specific SNPs were detected throughout the  
344 whole cpDNA alignment. They could serve as potential molecular markers, especially for berry  
345 food product authentication, as we included the major economically important *Vaccinium*  
346 species in the analyses.

347           In this study, the whole cpDNA phylogenetic analysis was able to distinguish the species  
348 of the genus *Vaccinium* and most of the sections were monophyletic. However, the  
349 phylogenetic relationships in the *Vaccinium* genus are complex, especially when analyzing  
350 domesticated genotypes. Incongruences between the chloroplast phylogeny and previous  
351 nuclear phylogenies can be pointed out for cultivated blueberries. The chloroplast genomes of  
352 the NHB and SHB genotypes used herein have different origins, with NHB being more closely  
353 related to lowbush, and SHB to rabbiteye. In the phylogenetic trees derived from nuclear

354 genome-wide SNPs [43, 44] and SSRs [45], SHB and NHB genotypes were intertwined and more  
355 closely related to each other than to lowbush or rabbiteye. Given the primary contribution of *V.*  
356 *corymbosum* to the genetic background of both NHB and SHB [46], it is expected that the  
357 nuclear genome would reflect the described pattern. On the other hand, the cpDNA will trace  
358 back the maternal line inheritance. As interspecific hybridizations have been extensively used in  
359 blueberry breeding programs, lowbush and rabbiteye lineages are present in the NHB and SHB  
360 genetic background as secondary gene pools. *V. angustifolium* has been used since the  
361 beginning of highbush blueberry domestication [47], with genotypes such as ‘Russell’ and  
362 ‘North Sedgewick’ being widely used in crosses. During the development of SHB, several  
363 rabbiteye genotypes were used as parents to reduce the chilling requirement of NHB [11, 48,  
364 49]. Therefore, different cultivars of NHB and SHB will likely show different plastome clustering  
365 patterns based on the maternal pedigree. Expanding this study to additional wild *Vaccinium*  
366 species and multiple individuals would help to clarify their hybridization history and avoid  
367 unclear clustering of single accessions [50]. The chloroplast phylogeny also highlights the  
368 placement of *V. uliginosum* section *Vaccinium* among species in the section *Cyanococcus*.  
369 Intersectional crosses have generally proved difficult to perform, yielding mostly sterile hybrids  
370 [51]. However, successful crosses between *V. uliginosum* and *V. corymbosum* were reported to  
371 produce meiotically regular and fruitful hybrids [52], which reinforces their closer phylogenetic  
372 proximity.

373

374

375

## 376 **Conclusions**

377 In this study, the chloroplast genomes of five economically important *Vaccinium* species were  
378 assembled: northern highbush blueberry, southern highbush blueberry, rabbiteye blueberry,  
379 lowbush blueberry, and bilberry. We also performed manual curation of gene annotations and  
380 comparative analyses of these genomes, including the previously available cranberry plastome  
381 sequence. The *Vaccinium* chloroplast genomes were highly conserved in terms of structure and  
382 sequence, with some variability found mostly in non-coding regions and at the IR/LSC  
383 boundaries. Copy number variation of genes requires further investigation as they could be a  
384 result of assembly artifacts in draft genomes. Species-specific allelic variants were found for  
385 SNPs, but not for SSRs. The phylogenetic tree based on whole cpDNA alignment showed the  
386 presence of distinct maternal genomes in highbush blueberries, highlighting the independent  
387 evolution of cytoplasmic and nuclear genomes. In addition, chloroplast phylogenetic analyses  
388 did not support the monophyly of the *Cyanococcus* section. The availability of more chloroplast  
389 genomes from *Vaccinium* species will provide a valuable resource for future comparative  
390 studies and phylogenetic resolution of the genus, and for reconstructing the domestication  
391 history of cultivated berry crops.

392

393

394

395

396

## 397 **Methods**

### 398 ***Plant material***

399           The plant material used to generate the DNA sequences for the assembly of the  
400 chloroplast DNAs (cpDNAs) included the *V. corymbosum* hybrid cv. 'Arcadia' (Southern  
401 Highbush Blueberry - SHB), *V. virgatum* cv. 'Ochlockonee' (Rabbiteye Blueberry - RB), and *V.*  
402 *angustifolium* cv. 'Brunswick' (Lowbush Blueberry - LB) obtained from commercial nurseries  
403 and maintained at the University of Florida, FL, USA. The plant material for the *V. myrtillus*  
404 genotype 'OU-L2' (Bilberry -BB) was collected from the coniferous forest in the municipality of  
405 Oulu, Finland (64°59'08.1"N 25°54'12.0"E) and maintained at the University of Oulu. No special  
406 permission was required for sampling the bilberry individual at this location. The genomic  
407 sequences used to assemble the cpDNA of the *V. corymbosum* cv. 'Draper' (Northern Highbush  
408 Blueberry - NHB) were downloaded from the Sequence Read Archive (SRA) under the  
409 BioProject PRJNA494180 [53]. The cpDNA sequence assembly for *V. macrocarpon* cv. 'Stevens'  
410 (Cranberry - CB) was downloaded from GenBank (MK715447.1) [22].

411

### 412 ***DNA extraction and sequencing***

413           The high molecular weight DNA extraction from young leaf tissue and the PacBio long  
414 read sequencing for the SHB and rabbiteye samples were carried out at the Arizona Genomics  
415 Institute, University of Arizona (Tucson, AZ, USA). Briefly, the high molecular weight DNA was  
416 extracted using a modified CTAB method and sheared to mode size of approximately 40 kb  
417 using G-Tube. PacBio sequencing libraries were constructed using the Express v2 kit (Pacific  
418 Biosciences). Template molecules were size selected on BluePippin for either 35 kb and larger

419 (U1) or 20 kb and larger (S1) methods (Sage Sciences). Sequencing was performed on PacBio  
420 Sequel II, in CLR mode with a loading concentration of 50 pmol or larger. PacBio consumables  
421 used were PacBio Sequel 1.0 chemistry, 8Mv1 cells and 15 hr run time.

422 Short-read Illumina whole genome sequencing was obtained for the SHB, rabbiteye,  
423 lowbush and bilberry samples by extracting genomic DNA from leaf tissue using the CTAB  
424 method. DNA library preparation and sequencing were carried out at GENEWIZ LCC. (South  
425 Plainfield, NJ, USA). Paired end libraries (2x150 bp) were sequenced on an Illumina HiSeq4000  
426 instrument. For bilberry, Illumina paired end library preparation and sequencing was conducted  
427 at Sequentia Biotech SL (Barcelona, Spain), using NovaSeq 6000 instrument (2x150 bp). The  
428 mean insert size for SHB, rabbiteye, lowbush and bilberry was 325 bp, while the Illumina  
429 sequencing data downloaded for NHB included libraries with five different insert sizes: 470 bp,  
430 800 bp, 4,000 bp, 7,000 bp and 10,000 bp (Table S1).

431

### 432 ***Long-read assembly and polishing***

433 PacBio long reads from SHB and rabbiteye were aligned to the reference cranberry  
434 cpDNA sequence using BLASR v.20130815 with parameters “--placeGapConsistently, --hitPolicy  
435 randombest, --bestn 1, --minMatch 15, and --minAlnLength 500” [54]. The aligned sequence  
436 was converted into FASTQ format using the function “bamtofastq” from bedtools v2.29.2  
437 software [55]. The retrieved reads were assembled with Canu v1.9 using the parameters  
438 “minReadLength=1000, minOverlapLength=500, genomeSize=200k, correctedErrorRate=0.030,  
439 and corOutCoverage=40” [56]. The longest contig generated by Canu was circularized using  
440 Circlator v.1.5.5 [57] and polished with the Arrow algorithm implemented in the GCpp v1.9.0

441 software [58]. Five total rounds of polishing with Arrow were performed for SHB and rabbiteye  
442 before moving to a second polishing method. The second polishing step was performed with  
443 the software Pilon v1.22 [59] using Illumina short reads and default parameters until no more  
444 changes were introduced into the sequence (for up to five successive rounds).

445

#### 446 ***Short-read assembly and polishing***

447 For NHB and lowbush samples, short Illumina read assemblies were performed with the  
448 NovoPlasty v3.8.3 software with default parameters [60]. The resulting scaffolds were aligned  
449 to the SHB cpDNA assembly obtained previously with long-read data, using the “nucmer” tool  
450 available in Mummer v4.0 [61]. The pairwise alignments were visualized using the Mummer  
451 tools “show-coords” and “mummerplot” and the individual NovoPlasty scaffolds were ordered  
452 and merged into one pseudo-molecule for each sample according to their placement along the  
453 reference SHB cpDNA assembly. A stretch of Ns was inserted at the junction sites between  
454 concatenated scaffolds.

455 A similar strategy was used for the bilberry assembly. Raw short Illumina reads were  
456 aligned to the cpDNA sequence of *Vaccinium oldhamii* (GenBank accession: NC\_042713.1) [24].  
457 The mapped reads were then extracted, and de novo assembled with Spades 3.15.3 [62] and  
458 with CAP3 v.20120705 [63]. The two assemblies were then aligned to the reference *V. oldhamii*  
459 genome, the scaffolds were ordered and then merged into one pseudo-molecule.

460 The NHB, lowbush, and bilberry assemblies were polished using Pilon v1.22 as described  
461 above. The NHB and lowbush assemblies were polished multiple times, until no further changes  
462 were introduced into the sequences (i.e., four and three rounds, respectively). The bilberry

463 assembly was subjected to only one round of polishing, because additional rounds inserted  
464 sequences into multiple sites, generating tandem repeats.

465 To obtain a more continuous sequence in the inverted repeat (IR) regions, for each  
466 species the sequences of IRA and IRB were aligned, and the consensus sequence was inserted  
467 back into the cpDNA assembly to replace the original IR sequences. Finally, when comparing the  
468 IR sequence length in the cranberry assembly downloaded from GenBank, we noticed that two  
469 bases were absent from one of the IRs. These nucleotides were inserted into the IR where they  
470 were missing, resulting in both IRs having the same length and sequence in the cranberry  
471 cpDNA.

472

### 473 ***Gene and SSR annotation***

474 The cpDNA sequences were annotated to predict gene content and position. Two online  
475 tools were employed: (i) GeSeq v2.03 by setting parameters “protein search identity= 70; rRNA,  
476 tRNA, DNA search identity =85; and selecting the 3<sup>rd</sup> party tRNA annotators ARAGORN v1.2.38  
477 and tRNAscan-SE v2.0.5” [64]; and (ii) CpGAVAS with default parameters [65]. The annotations  
478 obtained with both methods were not consistent for many genes. Discordant annotations were  
479 manually curated by comparing the software outputs with gene models available for other  
480 species in the CpGDB database [66]. The gene sequences predicted for the *Vaccinium* species  
481 were compared to the sequence reported in the CpGDB for *Vaccinium* and other model species,  
482 including *V. macrocarpon*, *Vaccinium oldhamii*, *Arabidopsis thaliana*, *Brassica napus*, *Amborella*  
483 *trichopoda*, and *Populus trichocarpa*. Manual curation of gene features was performed for the  
484 five *Vaccinium* cpDNAs assembled in this study and for the cranberry cpDNA.



485           Considering the potential importance of Simple Sequence Repeats (SSRs) in generating  
486 genomic diversity, the cpDNA assemblies were annotated using the MISA-web v2.1 software  
487 [67]. The minimum number of repetitions was set at ten for mononucleotide repeats, five for  
488 dinucleotide repeats, four for trinucleotide repeats, and three for tetra, penta-, and hexa-  
489 nucleotide repeats. Orthologous SSRs were inspected for polymorphisms by looking at the  
490 multiple sequence alignments (see below).

491

### 492 ***Comparative analyses***

493           To investigate the genome structure of the cpDNAs, circular maps were drawn using  
494 OGDRAW v1.3.1 [68]. The cpDNA assemblies were compared by conducting multiple sequence  
495 alignments using mVISTA with the LAGAN mode [69] and with the EMMA tool in the EMBOSS  
496 v6.5.7 software [70] using the ClustalW v.2.1 aligner [71]. The online tool Multiple Sequence  
497 Alignment Viewer v1.21.0 [72] was used to visualize alignments generated with EMMA and to  
498 estimate the percentage of identity between sequences. Prior to conducting these multiple  
499 sequence alignments, the cpDNA sequences were modified to break their circular DNA  
500 molecules at the same site as the cranberry cpDNA to ensure that the alignments would start at  
501 the same position.

502

### 503 ***Phylogenetic analysis***

504           To infer the phylogenetic relationships among our sequences and other available  
505 chloroplast genomes from *Vaccinium* species, we downloaded the GenBank sequences of *V.*  
506 *oldhami* (NC\_042713.1), *V. bracteatum* (LC521967.1), *V. duclouxii* (MK816300.1), *V. fragile*

507 (MK816301.1), *V. uliginosum* (LC521968.1), *V. japonicum* (MW006668.1), *V. microcarpum*  
508 (MK715444.1), and *V. vitis-idaea* (LC521969.1). The sequence of *Rhododendron delavayi*  
509 (MN413198.1) was used as an outgroup to root the tree. Given that we did not perform manual  
510 gene curation on these other assemblies, we used a whole chloroplast genome alignment  
511 approach to avoid variations due to misprediction. For this, all assemblies were reordered to  
512 start with the *rbcl* gene sequence using Circlator v.1.5.5 [57]. We used the HomBlocks pipeline  
513 to align the whole cpDNA genomes and determine locally collinear blocks among them [73].  
514 The final concatenated alignment length was 86,628 bp divided into eight blocks. The best  
515 substitution model based on the Bayesian Information Criterion (BIC) for all eight blocks was  
516 “TVM+G”, computed using PartitionFinder v.2.1.1.0 [74]. The concatenated alignment and the  
517 “TVM+G” model were then used to reconstruct a maximum likelihood phylogenetic tree using  
518 IQ-TREE v.2.1.0 [75] with 1000 ultrafast bootstraps [76]. The resulting tree was visualized with  
519 iTOL v.6 [77].

520 To visualize the mutational steps differentiating the *Vaccinium* species and identify  
521 species-specific markers, the HomBlocks alignment was also used for haplotype network  
522 reconstruction using PopART [78] with TCS method [79].

523

## 524 **References**

- 525 1. vander Kloet SP. The genus *Vaccinium* in North America. Research Branch Agriculture  
526 Canada Publ. 1988.
- 527 2. Ballington JR. Collection, utilization, and preservation of genetic resources in *Vaccinium*.  
528 HortScience. 2001; 36.

- 529 3. The Vaccinium Coordinated Agricultural Project (VacCAP). <https://www.vacciniumcap.org/> .  
530 Accessed 21 Feb 2022.
- 531 4. Sleumer H. Vaccinioidee-Studien. Botanische Jahrbücher. 1941; 71.
- 532 5. Hancock JF, Lyrene P, Finn CE, Vorsa N, Lobos GA. Blueberries and cranberries. In Hancock JF  
533 editor. Temperate fruit crop breeding. Dordrecht: Springer; 2008.
- 534 6. Kron KA, Powell EA, Luteyn JL. Phylogenetic relationships within the blueberry tribe  
535 (Vaccinieae, Ericaceae) based on sequence data from matK and nuclear ribosomal ITS regions,  
536 with comments on the placement of Satyria. American Journal of Botany. 2002;89.
- 537 7. vander Kloet SP. Vaccinia gloriosa. In: Small Fruits Review. 2004;3.
- 538 8. Camp WH. The North American blueberries with notes on other groups of Vacciniaceae.  
539 Brittonia. 1945;5.
- 540 9. Weakley AS. Flora of the Southern and Mid-Atlantic States May 2015.  
541 <https://ncbg.unc.edu/research/unc-herbarium/floras/>. 2015; Accessed 21 Feb 2022.
- 542 10. Sharpe RH, Darrow GM. Breeding blueberries for the Florida climate. Proceedings of the  
543 Florida State Horticultural Society. 1959;72.
- 544 11. Darrow GM, Dermen H, Scott DH. A tetraploid blueberry: From a Cross of Diploid and  
545 Hexaploid Species. Journal of Heredity. 1949;40.
- 546 12. Draper AD. Draper, A. D. "Tetraploid hybrids from crosses of diploid, tetraploid, and  
547 hexaploid Vaccinium species. Acta Horticulturae. 1977; 61.
- 548 13. Ballington JR. The role of interspecific hybridization in blueberry improvement. Acta  
549 Horticulturae. 2009;810.

- 550 14. Vorsa N, Johnson-Cicalese J, Polashock J. A blueberry by cranberry hybrid derived from a  
551 *Vaccinium darrowii* x (*V. macrocarpon* x *V. oxycoccos*) intersectional cross. *Acta Horticulturae*.  
552 2009;810.
- 553 15. Lyrene PM. Value of various taxa in breeding tetraploid blueberries in Florida. *Euphytica*.  
554 1997;94.
- 555 16. Schlautman B, Covarrubias-Pazaran G, Fajardo D, Steffan S, Zalapa J. Discriminating power  
556 of microsatellites in cranberry organelles for taxonomic studies in *Vaccinium* and *Ericaceae*.  
557 *Genetic Resources and Crop Evolution*. 2017;64.
- 558 17. Powell EA, Kron KA, Liston A. Hawaiian blueberries and their relatives - A phylogenetic  
559 analysis of *Vaccinium* sections *Macropelma*, *Myrtillus*, and *Hemimyrtillus* (*Ericaceae*).  
560 *Systematic Botany*. 2002;27.
- 561 18. Parks M, Cronn R, Liston A. Increasing phylogenetic resolution at low taxonomic levels using  
562 massively parallel sequencing of chloroplast genomes. *BMC Biology*. 2009;7.
- 563 19. Ma PF, Zhang YX, Zeng CX, Guo ZH, Li DZ. Chloroplast phylogenomic analyses resolve deep-  
564 level relationships of an intractable bamboo tribe *Arundinarieae* (*Poaceae*). *Systematic Biology*.  
565 2014;63.
- 566 20. Daniell H, Lin CS, Yu M, Chang WJ. Chloroplast genomes: Diversity, evolution, and  
567 applications in genetic engineering. *Genome Biology*. 2016;17.
- 568 21. Fajardo D, Senalik D, Ames M, Zhu H, Steffan SA, Harbut R, et al. Complete plastid genome  
569 sequence of *Vaccinium macrocarpon*: Structure, gene content, and rearrangements revealed by  
570 next generation sequencing. *Tree Genetics and Genomes*. 2013;9.

- 571 22. Diaz-Garcia L, Rodriguez-Bonilla L, Smith T, Zalapa J. Pacbio sequencing reveals identical  
572 organelle genomes between american cranberry (*Vaccinium macrocarpon* ait.) and a wild  
573 relative. *Genes*. 2019;10.
- 574 23. Kim Y, Shin J, Oh DR, Kim DW, Lee HS, Choi C. Complete chloroplast genome sequences of  
575 *Vaccinium bracteatum* Thunb., *V. vitis-idaea* L., and *V. uliginosum* L. (Ericaceae). *Mitochondrial*  
576 *DNA Part B: Resources*. 2020;5.
- 577 24. Kim SC, Baek SH, Lee JW, Hyun HJ. Complete chloroplast genome of *Vaccinium oldhamii* and  
578 phylogenetic analysis. *Mitochondrial DNA Part B: Resources*. 2019;4.
- 579 25. Chen X, Liu Q, Guo W, Wei H, Wang J, Zhu D, et al. The complete chloroplast genome of  
580 *Vaccinium duclouxii*, an endemic species in China. *Mitochondrial DNA Part B: Resources*.  
581 2019;4.
- 582 26. Guo W, Luo L, Huang Y, Li G, Wang X, Cheng T, et al. The complete chloroplast genome of  
583 *Vaccinium fragile* (Vacciniaceae), a shrub endemic to China. *Mitochondrial DNA Part B:*  
584 *Resources*. 2019;4.
- 585 27. Cho WB, Han EK, Choi IS, Son DC, Chung GY, Lee JH. The complete plastid genome sequence  
586 of *Vaccinium japonicum* (Ericales: Ericaceae), a deciduous broad-leaved shrub endemic to East  
587 Asia. *Mitochondrial DNA Part B: Resources*. 2021;6.
- 588 28. Wang X, Cheng F, Rohlsen D, Bi C, Wang C, Xu Y, et al. Organellar genome assembly  
589 methods and comparative analysis of horticultural plants. *Horticulture Research*. 2018;5.
- 590 29. Salo HM, Nguyen N, Alakärppä E, Klavins L, Hykkerud AL, Karppinen K, et al. Authentication  
591 of berries and berry-based food products. *Comprehensive Reviews in Food Science and Food*  
592 *Safety*. 2021;20.

- 593 30. Jin S, Daniell H. The Engineered Chloroplast Genome Just Got Smarter. Trends in Plant  
594 Science. 2015;20.
- 595 31. De-la-Peña C, León P, Sharkey TD. Editorial: Chloroplast Biotechnology for Crop  
596 Improvement. Frontiers in Plant Science. 2022;13.
- 597 32. Jansen RK, Ruhlman TA. Plastid Genomes of Seed Plants. In Ralph Bock and Volker Knoop  
598 Editors. Genomics of chloroplasts and mitochondria. Dordrecht, Springer. 2012. p103-126.
- 599 33. Martínez-Alberola F, del Campo EM, Lázaro-Gimeno D, Mezquita-Claramonte S, Molins A,  
600 Mateu-Andrés I, et al. Balanced gene losses, duplications and intensive rearrangements led to  
601 an unusual regularly sized genome in *Arbutus unedo* chloroplasts. PLoS ONE. 2013;8.
- 602 34. Logacheva MD, Schelkunov MI, Shtratnikova VY, Matveeva M v., Penin AA. Comparative  
603 analysis of plastid genomes of non-photosynthetic Ericaceae and their photosynthetic relatives.  
604 Scientific Reports. 2016;6.
- 605 35. Li H, Guo Q, Li Q, Yang L. Long-reads reveal that *Rhododendron delavayi* plastid genome  
606 contains extensive repeat sequences, and recombination exists among plastid genomes of  
607 photosynthetic Ericaceae. PeerJ. 2020.
- 608 36. Wang W, Yang T, Wang HL, Li ZJ, Ni JW, Su S, et al. Comparative and Phylogenetic Analyses  
609 of the Complete Chloroplast Genomes of Six Almond Species (*Prunus* spp. L.). Scientific Reports.  
610 2020;10.
- 611 37. Palmer JD. Chloroplast DNA exists in two orientations. Nature. 1983;301.
- 612 38. Walker JF, Jansen RK, Zanis MJ, Emery NC. Sources of inversion variation in the small single  
613 copy (SSC) region of chloroplast genomes. American Journal of Botany. 2015;102.

- 614 39. Kim Y, Shin J, Oh DR, Kim AY, Choi C. Comparative analysis of complete chloroplast genome  
615 sequences and insertion-deletion (Indel) polymorphisms to distinguish five *Vaccinium* species.  
616 *Forests*. 2020;11.
- 617 40. Jakobsson M, Säll T, Lind-Halldén C, Halldén C. Evolution of chloroplast mononucleotide  
618 microsatellites in *Arabidopsis thaliana*. *Theoretical and Applied Genetics*. 2007;114.
- 619 41. George B, Bhatt BS, Awasthi M, George B, Singh AK. Comparative analysis of microsatellites  
620 in chloroplast genomes of lower and higher plants. *Current Genetics*. 2015;61.
- 621 42. Selkoe KA, Toonen RJ. Microsatellites for ecologists: A practical guide to using and  
622 evaluating microsatellite markers. *Ecology Letters*. 2006;9.
- 623 43. Nishiyama S, Fujikawa M, Yamane H, Shirasawa K, Babiker E, Tao R. Genomic insight into the  
624 developmental history of southern highbush blueberry populations. *Heredity*. 2021;126.
- 625 44. Kulkarni KP, Vorsa N, Natarajan P, Elavarthi S, Iorizzo M, Reddy UK, et al. Admixture analysis  
626 using genotyping-by-sequencing reveals genetic relatedness and parental lineage distribution in  
627 highbush blueberry genotypes and cross derivatives. *International Journal of Molecular*  
628 *Sciences*. 2021;22.
- 629 45. Bian Y, Ballington J, Raja A, Brouwer C, Reid R, Burke M, et al. Patterns of simple sequence  
630 repeats in cultivated blueberries (*Vaccinium* section *Cyanococcus* spp.) and their use in  
631 revealing genetic diversity and population structure. *Molecular Breeding*. 2014;34.
- 632 46. Brevis PA, Bassil N v., Ballington JR, Hancock JF. Impact of wide hybridization on highbush  
633 blueberry breeding. *Journal of the American Society for Horticultural Science*. 2008;133.
- 634 47. Coville FV. Improving the wild blueberry. In: G. Hambidge Editor. *USDA yearbook of*  
635 *agriculture*. Washington, U.S. Govt. Printing Office. 1937. p559–574.

- 636 48. Sharpe RH. Horticultural development of Florida blueberries. Proceedings of the Florida  
637 State Horticultural Society. 1953;66.
- 638 49. Goldy RG, Lyrene PM. Meiotic abnormalities of *Vaccinium ashei* × *Vaccinium darrowi*  
639 hybrids. Canadian Journal of Genetics and Cytology. 1984;26.
- 640 50. Magdy M, Ou L, Yu H, Chen R, Zhou Y, Hassan H, et al. Pan-plastome approach empowers  
641 the assessment of genetic variation in cultivated *Capsicum* species. Horticulture Research.  
642 2019;6.
- 643 51. Lyrene PM, Olmstead JW. The Use of Inter-Sectional Hybrids in Blueberry Breeding.  
644 International Journal of Fruit Science. 2012;12.
- 645 52. Rousi A. Hybridization between *Vaccinium uliginosum* and cultivated blueberry. *Annales*  
646 *Agriculturae Fenniae*. 1963;2.
- 647 53. Colle M, Leisner CP, Wai CM, Ou S, Bird KA, Wang J, et al. Haplotype-phased genome and  
648 evolution of phytonutrient pathways of tetraploid blueberry. *GigaScience*. 2019;8.
- 649 54. Chaisson MJ, Tesler G. Mapping single molecule sequencing reads using basic local  
650 alignment with successive refinement (BLASR): Application and theory. *BMC Bioinformatics*.  
651 2012;13.
- 652 55. Quinlan AR, Hall IM. BEDTools: A flexible suite of utilities for comparing genomic features.  
653 *Bioinformatics*. 2010;26.
- 654 56. Koren S, Walenz BP, Berlin K, Miller JR, Bergman NH, Phillippy AM. Canu: Scalable and  
655 accurate long-read assembly via adaptive  $\kappa$ -mer weighting and repeat separation. *Genome*  
656 *Research*. 2017;27.



- 657 57. Hunt M, Silva N de, Otto TD, Parkhill J, Keane JA, Harris SR. Circlator: Automated  
658 circularization of genome assemblies using long sequencing reads. *Genome Biology*. 2015;16.
- 659 58. GCpp. <https://github.com/PacificBiosciences/gcpp> . Accessed 21 Feb 2022.
- 660 59. Walker BJ, Abeel T, Shea T, Priest M, Abouelliel A, Sakthikumar S, et al. Pilon: An Integrated  
661 Tool for Comprehensive Microbial Variant Detection and Genome Assembly Improvement. *PLoS*  
662 *ONE*. 2014;9.
- 663 60. Dierckxsens N, Mardulyn P, Smits G. NOVOPlasty: De novo assembly of organelle genomes  
664 from whole genome data. *Nucleic Acids Research*. 2017;45.
- 665 61. Marçais G, Delcher AL, Phillippy AM, Coston R, Salzberg SL, Zimin A. MUMmer4: A fast and  
666 versatile genome alignment system. *PLoS Computational Biology*. 2018;14.
- 667 62. Bankevich A, Nurk S, Antipov D, Gurevich AA, Dvorkin M, Kulikov AS, et al. SPAdes: A New  
668 Genome Assembly Algorithm and Its Applications to Single-Cell Sequencing. *Journal of*  
669 *Computational Biology*. 2012;19.
- 670 63. Huang X, Madan A. CAP3: A DNA sequence assembly program. *Genome Research*. 1999;9.
- 671 64. Tillich M, Lehwark P, Pellizzer T, Ulbricht-Jones ES, Fischer A, Bock R, et al. GeSeq - Versatile  
672 and accurate annotation of organelle genomes. *Nucleic Acids Research*. 2017;45.
- 673 65. Liu C, Shi L, Zhu Y, Chen H, Zhang J, Lin X, et al. CpGAVAS, an integrated web server for the  
674 annotation, visualization, analysis, and GenBank submission of completely sequenced  
675 chloroplast genome sequences. *BMC Genomics*. 2012;13.
- 676 66. Singh BP, Kumar A, Kaur H, Singh H, Nagpal AK. CpGDB : A Comprehensive Database of  
677 Chloroplast Genomes. *Bioinformatics*. 2020;16.

- 678 67. Beier S, Thiel T, Münch T, Scholz U, Mascher M. MISA-web: A web server for microsatellite  
679 prediction. *Bioinformatics*. 2017;33.
- 680 68. Lohse M, Drechsel O, Kahlau S, Bock R. OrganellarGenomeDRAW--a suite of tools for  
681 generating physical maps of plastid and mitochondrial genomes and visualizing expression data  
682 sets. *Nucleic acids research*. 2013;41.
- 683 69. Frazer KA, Pachter L, Poliakov A, Rubin EM, Dubchak I. VISTA: Computational tools for  
684 comparative genomics. *Nucleic Acids Research*. 2004;32.
- 685 70. Rice P, Longden L, Bleasby A. EMBOSS: The European Molecular Biology Open Software  
686 Suite. *Trends in Genetics*. 2000;16.
- 687 71. Larkin MA, Blackshields G, Brown NP, Chenna R, Mcgettigan PA, McWilliam H, et al. Clustal  
688 W and Clustal X version 2.0. *Bioinformatics*. 2007;23.
- 689 72. NCBI Multiple Sequence Alignment Viewer.  
690 <https://www.ncbi.nlm.nih.gov/projects/msviewer/>. Accessed: 21 Feb 2022.
- 691 73. Bi G, Mao Y, Xing Q, Cao M. HomBlocks: A multiple-alignment construction pipeline for  
692 organelle phylogenomics based on locally collinear block searching. *Genomics*. 2018;110.
- 693 74. Cognato AI, Vogler AP. Exploring data interaction and nucleotide alignment in a multiple  
694 gene analysis of *Ips* (Coleoptera: Scolytinae). *Systematic Biology*. 2001;50.
- 695 75. Minh BQ, Schmidt HA, Chernomor O, Schrempf D, Woodhams MD, von Haeseler A, et al. IQ-  
696 TREE 2: New Models and Efficient Methods for Phylogenetic Inference in the Genomic Era.  
697 *Molecular Biology and Evolution*. 2020;37.
- 698 76. Hoang DT, Chernomor O, von Haeseler A, Minh BQ, Vinh LS. UFBoot2: Improving the  
699 ultrafast bootstrap approximation. *Molecular Biology and Evolution*. 2018;35.

- 700 77. Letunic I, Bork P. Interactive tree of life (iTOL) v5: An online tool for phylogenetic tree  
701 display and annotation. *Nucleic Acids Research*. 2021;49.
- 702 78. Leigh JW, Bryant D. POPART: Full-feature software for haplotype network construction.  
703 *Methods in Ecology and Evolution*. 2015;6.
- 704 79. Clement M, Snell Q, Walke P, Posada D, Crandall K. TCS: Estimating gene genealogies. In:  
705 *Proceedings - International Parallel and Distributed Processing Symposium, IPDPS 2002*.

706

707 **Additional files**

708 **Additional file 1: PDF**

709 Title: Supplementary Figures

710 **Figure S1.** Circular chloroplast genome maps of six cultivated *Vaccinium* species.

711 **Figure S2.** ClustalW multiple sequence alignment of the complete plastomes of six cultivated  
712 *Vaccinium* species.

713 **Figure S3.** Sequence variability of 11 SSRs identified in six *Vaccinium* species.

714

715 **Additional file 2: xlsx**

716 Title: Supplementary Tables

717 **TableS1** - Sequencing data downloaded for NHB cv. 'Draper'

718 **TableS2**- Functional genes annotated and curated

719 **TableS3** - Putative pseudogenes/gene fragments

720 **TableS4** - Percentage of identity between *Vaccinium* plastomes

721 **TableS5** - Simple sequence repeats (SSRs) identified in the six *Vaccinium* plastomes

722 **TableS6** - Summary of SSRs

723 **TableS7** - SSR loci showing variation among species

724

725 **List of abbreviations**

726 SHB: Southern Highbush Blueberry

727 NHB: Northern Highbush Blueberry

728 RB: Rabbiteye Blueberry

729 LB: Lowbush Blueberry

730 BB: Bilberry

731 CB: Cranberry

732 cpDNA: chloroplast DNA

733 SSR: Simple Sequence Repeat

734 SNP: Single Nucleotide Polymorphism

735 ITS: Internal Transcribed Spacer

736 IRs: Inverted repeats

737 LSC: Large Single Copy

738 SSC: Small Single Copy

739 rRNA: ribosomal RNA

740 tRNA: transfer RNAs

741

742

743 **Declarations**

744 **Acknowledgements**

745 **Funding**

746 This work was supported by the UF/IFAS royalty fund generated by the licensing of blueberry  
747 cultivars and by the European Regional Development Fund through Interreg Baltic Sea Region  
748 Programme (NovelBaltic project).

749

750 **Availability of data and materials**

751 The complete chloroplast genomes and annotations were submitted and will be available in the  
752 NCBI database. Accession numbers will be added here and at Table 1 upon acceptance.

753

754 **Author information**

755 **Affiliations**

756 **Horticultural Sciences Department, University of Florida, Gainesville, FL 32611, USA**

757 Annette M. Fahrenkrog, Gabriel Matsumoto, Juliana Benevenuto, Patricio Munoz

758 **Ecology and Genetics Research Unit, University of Oulu, FI-90014, Oulu, Finland**

759 Katalin Toth, Soile Jokipii-Lukkari, Heikki M. Salo, Hely Häggman

760 **Inari Agriculture Nv, Industriepark Zwijnaarde 7a, 9052 Gent, Belgium**

761 Katalin Toth

762

763

764

765 **Contributions**

766 PM, JB, and HH conceived and supervised the study. JB, KT, SJL, and HMS collected the plant  
767 material and performed DNA extraction for sequencing. AMF, GM, and JB performed the  
768 analyses and interpreted the data. AFM and JB wrote the manuscript. All authors read, revised,  
769 and approved the final manuscript.

770

771 **Corresponding authors**

772 Juliana Benevenuto: [jbenevenuto@ufl.edu](mailto:jbenevenuto@ufl.edu)

773 Patricio Munoz: [p.munoz@ufl.edu](mailto:p.munoz@ufl.edu)

774

775 **Ethics declarations**

776 **Ethics approval and consent to participate**

777 Not applicable.

778 **Consent for publication**

779 Not applicable.

780 **Competing interests**

781 The authors declare that they have no competing interests. KT was affiliated to the University

782 of Oulu when the study started and by the time the manuscript was submitted, she was

783 employed by Inari Agriculture Nv.

784

785
